# Supplementary material for: Analysis of ‘legal high’ substances and common adulterants using handheld spectroscopic techniques
Source: Royal Society of Chemistry journal article supplement (doi:10.1039/c4ay02169j), 2014-11-28
Supplement: c4ay02169j1.pdf [file c4ay02169j1.pdf]

1 *Supplementary Data Assi et al.*

2 *S1. Analysis of blank test set*

3 A blank test set was used to investigate the selectivity of the instruments' inbuilt  
4 algorithms for the substances of interest (2AI, DXM and LID). The blank test set was  
5 binary and ternary mixtures of common excipients and adulterants (Table S1), in  
6 which no signature was stored for the mixture itself. It was also important that the  
7 blank test set was made not to contain any of the substances of interest which were 2-  
8 AI, DXM, LID and CAF. The blank test set was run and the signature(s), most  
9 consistent with the sample analysed, selected by the instruments' algorithms were  
10 compared (Table S2).

11 Using the microPHAZIR (NIR) CWS in-built identification, the test set was not  
12 consistent with any signature(s) in the library using this algorithm. It gave  $r$  values  
13 below 0.95 for all the blank test set mixtures (T1 - T8) against the pure substances and  
14 50:50 mixtures stored in the instrument library. The  $r$  values obtained for the blank  
15 test set ranged from 0.5105 - 0.9256 which were observed for T8 (BEN/PRO/MCC)  
16 and T4 (MCC/TAL) against BEN and MCC, respectively. The NIR algorithm reports  
17 only the signature most consistent with the sample analysed and does not provide a  
18 combination of signatures like the Raman and ATR-FT-IR.

19 The TruScan RM (Raman) probability identification algorithm gave slightly different  
20 results to the microPHAZIR CWS algorithm. This was because Raman, unlike NIR,  
21 detects primarily the chemical makeup of a sample. In addition, the probability  
22 algorithm reported correlations indicating how similar was the molecular signal of the  
23 test substance to the signature(s) in the instrument library. No mismatches were made  
24 to the signatures of 2AI, DXM, and LID. In most cases, the TruScan RM probability  
25 algorithm correlated with the signature of one or two constituents in the mixtures, in

26 discovery mode. In three cases, a ‘similar item’ or no match was observed and  
27 included T3 (TAL/PRO), T5 (PAR/MCC) and T7 (MCC/TAL/PAR). T3 gave a  
28 ‘similar item’ to the PRO signature, while T5 and T7 gave no match. The TruScan  
29 RM can indicate a ‘similar item’ if a test spectrum was not consistent with, but  
30 ‘similar’ to a library signature. Most mixtures containing BEN, including T1  
31 (BEN/TAL), T2 (BEN/PRO), and T8 (BEN/PRO/MCC), were consistent with the  
32 BEN signature as well as the signatures of other constituents in each mixture (Table  
33 S2). Only one mixture, T4 (MCC/TAL), gave a 100% correlation with MCC. This  
34 might be because TAL has low Raman scattering and it was present in only 25% m/m  
35 of the mixture.

36 For the TruDefender FT-IR probability identification algorithm, no mismatches were  
37 made to signatures from the analytes of interest (2AI, DXM, and LID). Using this  
38 algorithm, T3 (TAL/PRO) was consistent with TAL (62%), but mismatched MCC  
39 (12%). In the case of T4 (MCC/TAL), no % correlation was observed as both MCC  
40 and TAL have one predominant Raman band around  $1000\text{ cm}^{-1}$ ; these bands are broad  
41 and overlapping reducing the ability to distinguish them at this dilution ratio. The  
42 remaining binary mixtures were correlated to their individual constituents and were  
43 T1 (BEN/PAR), T2 (BEN/PRO) and T5 (PAR/MCC). The ternary mixtures, T6  
44 (PAR/BEN/PRO) and T8 (BEN/PRO/MCC), were both correlated to PRO and BEN.  
45 On the other hand, the ternary mixture T7 (TAL/MCC/PAR) correlated to TAL.

#### 46 *S2. Analysis of pure substances*

47 The pure substances correlated to their NIR signature far above the threshold (0.95)  
48 with a minimum  $r$  value of 0.9944 observed for BEN (Table S3). The correlations  
49 were slightly lower for the 50:50 mixtures of Mixture 1 (2AI/CAF), Mixture 2

50 (DXM/CAF) and Mixture 3 (LID/CAF), which gave the highest  $r$  values for their own  
51 signatures at 0.9644, 0.9874 and 0.9589, respectively.

52 Pure substances, except LID, were consistent with their corresponding Raman  
53 signatures with a minimum PVAL of 0.2279 observed for DXM (Table S3). Although  
54 the LID spectrum had a number of distinctive Raman bands, the spectra also showed  
55 broad fluorescence from 1300 – 1700  $\text{cm}^{-1}$ , which may have impacted the initial  
56 matching. The instrument then went into discovery mode where LID correlated to its  
57 own signature. Similarly, the 50:50 mixtures were consistent with their own signature  
58 with PVALs of 0.5652, 0.6004 and 0.5624 observed for 2AI/CAF, DXM/CAF and  
59 LID/CAF, respectively.

60 All the pure substances were consistent with their own ATR-FT-IR signature with  
61 correlation values of 100% (Table S3). On the other hand, the 50:50 mixtures were  
62 consistent with either their corresponding mixture signature or the individual  
63 signatures. The 2AI/CAF mixture correlated to the signatures of 2AI (56%) and CAF  
64 (37%), and LID/CAF correlated to the signatures of LID (57%) and CAF (40%). Only  
65 DXM/CAF correlated to both the mixture signature DXM/CAF (80%) and a pure  
66 substance, DXM (17%).

67

68 Table S1 Details of the binary and ternary powder mixtures used for the blank test set<sup>1</sup>

| Mixture number | Diluent A | Diluent B | Diluent C | A amount (% m/m) | B amount (% m/m) | C amount (% m/m) |
|----------------|-----------|-----------|-----------|------------------|------------------|------------------|
| T1             | BEN       | PAR       | NA        | 26.9             | 73.1             | NA               |
| T2             | BEN       | PRO       | NA        | 43.0             | 57.0             | NA               |
| T3             | TALC      | PRO       | NA        | 59.1             | 40.9             | NA               |
| T4             | MCC       | TALC      | NA        | 75.6             | 24.4             | NA               |
| T5             | PAR       | MCC       | NA        | 34.2             | 65.8             | NA               |
| T6             | PAR       | BEN       | PRO       | 35.6             | 32.7             | 31.6             |
| T7             | MCC       | TALC      | PAR       | 26.1             | 43.9             | 30.0             |
| T8             | BEN       | PRO       | MCC       | 24.8             | 32.2             | 43.0             |

69 <sup>1</sup>T: test samples, BEN: benzocaine, MCC: microcrystalline cellulose, PAR: paracetamol, PRO: procaine hydrochloride, TAL:  
70 talc.

71

72

73

74 Table S2 Mean comparison value of the blank test set using hand-held NIR, Raman  
75 and ATR-FT-IR spectroscopy<sup>1</sup>

| Substance | NIR               |                      | Raman             |                              | ATR-FT-IR         |                              |
|-----------|-------------------|----------------------|-------------------|------------------------------|-------------------|------------------------------|
|           | library signature | r value <sup>2</sup> | library signature | correlation (%) <sup>3</sup> | library signature | correlation (%) <sup>3</sup> |
| T1        | BEN               | 0.6479               | BEN<br>PAR        | <b>71.3</b><br><b>27</b>     | PAR<br>BEN        | <b>58</b><br><b>39</b>       |
| T2        | BEN               | 0.6743               | BEN<br>PRO        | <b>88.3</b><br><b>15</b>     | PRO<br>BEN        | <b>73</b><br><b>27</b>       |
| T3        | PRO               | 0.7323               | PRO               | Similar <sup>4</sup>         | TAL<br>MCC        | <b>62</b><br><b>12</b>       |
| T4        | MCC               | 0.9256               | MCC               | <b>100</b>                   | None              | 0                            |
| T5        | MCC               | 0.8287               | None              | 0                            | PAR<br>MCC        | <b>50</b><br><b>36</b>       |
| T6        | BEN               | 0.5762               | BEN               | <b>83</b>                    | PRO<br>BEN        | <b>56</b><br><b>40</b>       |
| T7        | TAL               | 0.5277               | None              | 0                            | TAL               | <b>84</b>                    |
| T8        | BEN               | 0.5105               | BEN<br>PRO        | <b>77.7</b><br><b>17.3</b>   | PRO<br>BEN        | <b>72</b><br><b>24</b>       |

76

<sup>1</sup>T: test mixture, BEN: benzocaine, PRO: procaine,

77

MCC: microcrystalline cellulose, TAL: talc, PAR: paracetamol. The numbers in bold indicate the test substance is consistent with the library signature.

78

<sup>2</sup> r value: correlation coefficient value.

79

<sup>3</sup>Correlation (%): indicates how much the test spectrum is similar to the library signature(s).

80

<sup>4</sup>The TruScan RM can indicate a 'similar item' if a test spectrum was not consistent with, but 'similar' to a library signature.

81

82

83

84

85

86

87

88

89

90

Table S3 Mean comparison values of the pure substances using hand-held NIR, Raman  
and ATR-FT-IR spectroscopy.<sup>1</sup>

| Substance | NIR               |                      | Raman library signature | PVAL <sup>3</sup> or Correlation (%) <sup>4</sup> | ATR-FT-IR         |                              |
|-----------|-------------------|----------------------|-------------------------|---------------------------------------------------|-------------------|------------------------------|
|           | library signature | r value <sup>2</sup> |                         |                                                   | library signature | Correlation (%) <sup>4</sup> |
| 2AI       | 2AI               | <b>0.9987</b>        | 2AI                     | <b>0.6207</b>                                     | 2AI               | <b>100</b>                   |
| BEN       | BEN               | <b>0.9944</b>        | BEN                     | <b>0.5826</b>                                     | BEN               | <b>100</b>                   |
| CAF       | CAF               | <b>0.9971</b>        | CAF                     | <b>0.5528</b>                                     | CAF               | <b>100</b>                   |
| DXM       | DXM               | <b>0.9971</b>        | DXM                     | <b>0.2279</b>                                     | DXM               | <b>100</b>                   |
| LAC       | LAC               | <b>0.9981</b>        | LAC                     | <b>0.5873</b>                                     | LAC               | <b>100</b>                   |
| LID       | LID               | <b>0.9966</b>        | LID                     | <b>100*</b>                                       | LID               | <b>100</b>                   |
| MCC       | MCC               | <b>0.9947</b>        | MCC                     | <b>0.4867</b>                                     | MCC               | <b>100</b>                   |
| PAR       | PAR               | <b>0.9987</b>        | PAR                     | <b>0.6272</b>                                     | PAR               | <b>100</b>                   |
| PRO       | PRO               | <b>0.9986</b>        | PRO                     | <b>0.5741</b>                                     | PRO               | <b>100</b>                   |
| TAL       | TAL               | <b>0.9991</b>        | TAL                     | <b>0.4433</b>                                     | TAL               | <b>100</b>                   |
| 2AI/CAF   | 2AI/CAF           | <b>0.9644</b>        | 2AI/CAF                 | <b>0.5652</b>                                     | 2AI<br>CAF        | <b>56</b><br><b>37</b>       |
| DXM/CAF   | DXM/CAF           | <b>0.9874</b>        | DXM/CAF                 | <b>0.6004</b>                                     | DXM/CAF<br>DXM    | <b>80</b><br><b>17</b>       |
| LID/CAF   | LID/CAF           | <b>0.9589</b>        | LID/CAF                 | <b>0.5624</b>                                     | LID<br>CAF        | <b>57</b><br><b>40</b>       |

91

<sup>1</sup>D: dilution number, AI: aminoindan hydrochloride, CAF: caffeine, DXM: dextromethorphan hydrobromide, LID: lidocaine hydrochloride. The numbers in bold indicate the test substance is consistent with the library signature.

92

<sup>2</sup> r value: correlation coefficient value

93

<sup>3</sup> PVAL: probability value of the test substance spectrum against the selected library spectrum. A PVAL above 0.05 indicates that the test spectrum is consistent with the library spectrum; the asterisk (\*) indicates a PVAL < 0.05 where the algorithm then compared the test substances to other signatures in discovery mode.

94

95

96

<sup>4</sup>Correlation (%): indicates how much the test spectrum is similar to the library signature(s).

97

98
